# Supplementary material for: Polymer brushes on structural surfaces: a novel synergistic strategy for perfectly resisting algae settlement
Source: Royal Society of Chemistry journal article supplement (doi:10.1039/c7bm00842b), 2017-01-01
Supplement: c7bm00842b1.pdf [file c7bm00842b1.pdf]

## Electronic Supplementary Information

### **Polymer brushes on structural surfaces: a novel synergistic strategy for perfectly resisting algae settlement**

*Yu Zhang<sup>a,b,c</sup>, Haiyuan Hu<sup>a</sup>, Xiaowei Pei<sup>a</sup>, Yupeng Liu<sup>a\*</sup>, Qian Ye<sup>a,d\*</sup>, and Feng Zhou<sup>a</sup>*

<sup>a</sup> State Key Laboratory of Solid Lubrication, Lanzhou Institute of Chemical Physics, Chinese Academy of Sciences, Lanzhou, 730000, China

<sup>b</sup> University of Chinese Academy of Sciences, Beijing, 100049, China

<sup>c</sup> School of Electromechanical Engineering and Key Laboratory of Mechanical Equipment Manufacturing and Control Technology of Ministry of Education, Guangdong University of Technology, Guangzhou, 510006, China

<sup>d</sup> Research & Development Institute of Northwestern Polytechnical University in Shenzhen, School of Materials Science and Engineering, Northwestern Polytechnical University, Xi'an, 710072, China

\*E-mail: yeqian213@nwpu.edu.cn

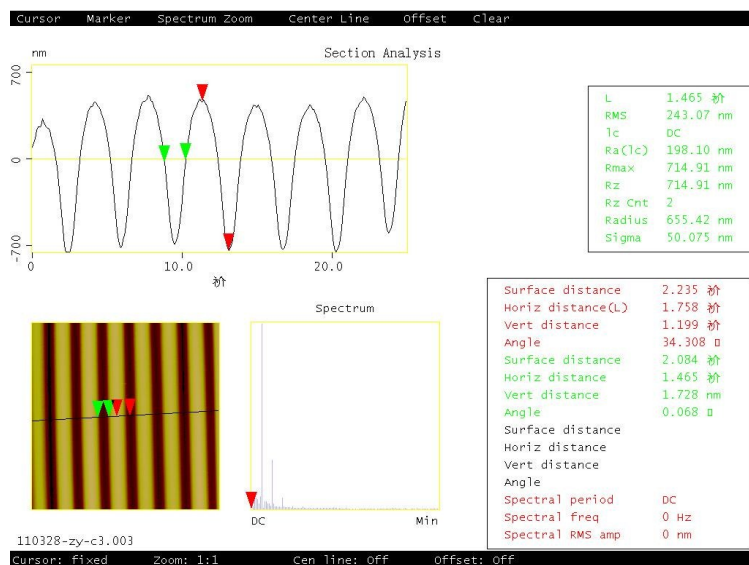

**Figure S1.** AFM images of wrinkled PDMS (Up) and the corresponding section analysis (Down).

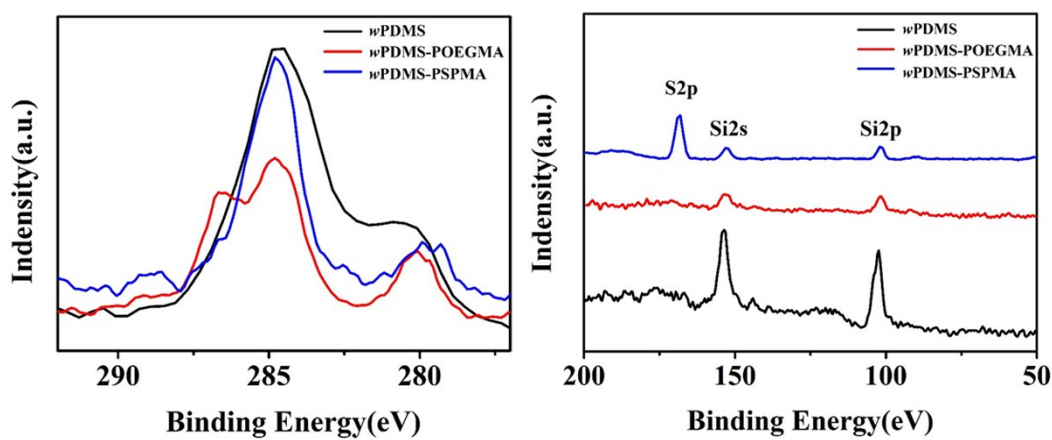

**Figure S2.** High-resolution C (left), S, and Si (right) spectra of wPDMS, wPDMS-POEGMA, and wPDMS-PSPMA samples.

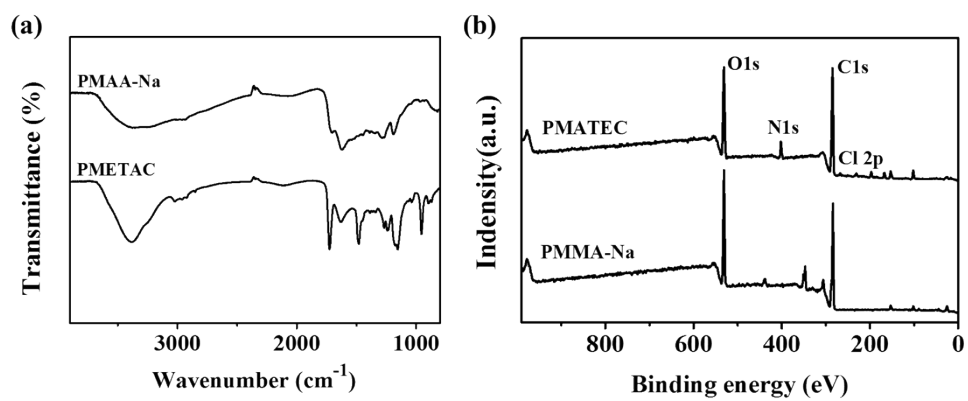

**Figure S3.** FT-IR spectra (a) and XPS survey spectra (b) of *w*PDMS-PMMA and *w*PDMS-PMETAC, respectively.
